# Supplementary material
Source: publisher site journal article supplement (https://www.dovepress.com/article/343277)
Supplement: Supplementary file 1 [file get_supplementary_file.php]

| **Case series/Retrospective Studies** | | **Q1** | | | | **Q2** | | | | **Q3** | | | **Q4** | | | | **Q5** | | | | **Q6** | | | | **Q7** | | | **Q8** | | | | **Q9** | | | | | **Q10** | | |
| --- | --- | --- | --- | --- | --- | --- | --- | --- | --- | --- | --- | --- | --- | --- | --- | --- | --- | --- | --- | --- | --- | --- | --- | --- | --- | --- | --- | --- | --- | --- | --- | --- | --- | --- | --- | --- | --- | --- | --- |
| Sha 201910 | | Y | | | | Y | | | | Y | | | Y | | | | U | | | | N | | | | Y | | | U | | | | Y | | | | | Y | | |
| Cousins 201921 | | Y | | | | Y | | | | Y | | | Y | | | | U | | | | Y | | | | Y | | | Y | | | | Y | | | | | Y | | |
| Sandhu 201350 | | Y | | | | Y | | | | Y | | | Y | | | | Y | | | | Y | | | | Y | | | Y | | | | Y | | | | | Y | | |
| Migone 201520 | | Y | | | | Y | | | | Y | | | Y | | | | U | | | | N | | | | Y | | | Y | | | | Y | | | | | Y | | |
| Robert 201322 | | Y | | | | Y | | | | Y | | | Y | | | | Y | | | | Y | | | | Y | | | Y | | | | Y | | | | | Y | | |
| Pretto 201252 | | Y | | | | Y | | | | Y | | | Y | | | | Y | | | | Y | | | | Y | | | U | | | | Y | | | | | Y | | |
| Sonstein 201445 | | Y | | | | Y | | | | Y | | | Y | | | | Y | | | | Y | | | | Y | | | U | | | | Y | | | | | Y | | |
| Tang 201438 | | Y | | | | Y | | | | Y | | | Y | | | | U | | | | Y | | | | Y | | | N/a | | | | Y | | | | | Y | | |
| Menzella 201219 | | Y | | | | Y | | | | Y | | | N | | | | Y | | | | Y | | | | Y | | | Y | | | | Y | | | | | Y | | |
| Considine 201166 | | Y | | | | Y | | | | Y | | | N | | | | Y | | | | Y | | | | Y | | | Y | | | | Y | | | | | Y | | |
| Harrisons 201737 | | Y | | | | Y | | | | Y | | | U | | | | U | | | | Y | | | | Y | | | Y | | | | Y | | | | | Y | | |
| Brownridge 201747 | | Y | | | | Y | | | | Y | | | U | | | | Y | | | | Y | | | | Y | | | Y | | | | Y | | | | | Y | | |
| Johnson 201331 | | Y | | | | Y | | | | Y | | | U | | | | Y | | | | Y | | | | Y | | | Y | | | | Y | | | | | Y | | |
| Khialani 201423 | | Y | | | | Y | | | | Y | | | Y | | | | Y | | | | Y | | | | Y | | | Y | | | | Y | | | | | Y | | |
| Fanning 201448 | | Y | | | | Y | | | | Y | | | Y | | | | Y | | | | Y | | | | Y | | | Y | | | | Y | | | | | Y | | |
| Au 201346 | | Y | | | | Y | | | | Y | | | U | | | | Y | | | | Y | | | | Y | | | Y | | | | Y | | | | | Y | | |
| Markun 201733 | | Y | | | | Y | | | | Y | | | U | | | | Y | | | | Y | | | | Y | | | Y | | | | Y | | | | | Y | | |
| Pozo-Rodríguez 201254 | | Y | | | | y | | | | y | | | y | | | | y | | | | y | | | | y | | | y | | | | y | | | | | y | | |
| **Critical appraisal for case series or retrospective audits Q1-Q10**  Q1. Were there clear criteria for inclusion in the case series? Q2. Was the condition measured in a standard, reliable way for all participants included in the case series? Q3. Were valid methods used for identification of the condition for all participants included in the case series? Q4. Did the case series have consecutive inclusion of participants? Q5. Did the case series have complete inclusion of participants? Q6. Was there clear reporting of the demographics of the participants in the study? Q7. Was there clear reporting of clinical information of the participants? Q8. Were the outcomes or follow up results of cases clearly reported? Q9. Was there clear reporting of the presenting site(s)/clinic(s) demographic information? Q10. Was statistical analysis appropriate? | | | | | | | | | | | | | | | | | | | | | | | | | | | | | | | | | | | | | | | |
| **Reviews** | **Q1** | | | | **Q2** | | **Q3** | | | | **Q4** | | | | | **Q5** | | | | **Q6** | | | **Q7** | | | | **Q8** | | | | **Q9** | | | **Q10** | | | | **Q11** | |
| Overington 201412 | Y | | | | Y | | U | | | | Y | | | | | U | | | | Y | | | Y | | | | U | | | | U | | | Y | | | | Y | |
| Cousins 201635 | y | | | | Y | | U | | | | Y | | | | | U | | | | U | | | Y | | | | U | | | | U | | | Y | | | | Y | |
| Melani 201649 | Y | | | | Y | | U | | | | U | | | | | Y | | | | Y | | | Y | | | | U | | | | Y | | | Y | | | | Y | |
| **Critical appraisal indicators for systematic reviews and review synthesis Q1-Q11**  Q1. Is the review question clearly and explicitly stated? Q2. Were the inclusion criteria appropriate for the review question? Q3. Was the search strategy appropriate? Q4. Were the sources and resources used to search for studies adequate? Q5. Were the criteria for appraising studies appropriate? Q6. Was critical appraisal conducted by two or more reviewers independently? Q7. Were there methods to minimize errors in data extraction? Q8. Were the methods used to combine studies appropriate? Q9. Was the likelihood of publication bias assessed? Q10. Were recommendations for policy and/or practice supported by the reported data? Q11. Were the specific directives for new research appropriate? | | | | | | | | | | | | | | | | | | | | | | | | | | | | | | | | | | | | | | | |
| **Cross sectional Studies** | | | | **Q1** | | | | **Q2** | | | | | | **Q3** | | | | | **Q4** | | | | | **Q5** | | | | | **Q6** | | | | | | **Q7** | | | | | |
| Ta 200943 | | | | Y | | | | Y | | | | | | Y | | | | | Y | | | | | U | | | | | U | | | | | | Y | | | | | |
| Masoompour 201458 | | | | Y | | | | Y | | | | | | Y | | | | | Y | | | | | Y | | | | | Y | | | | | | Y | | | | | |
| Alsubaei 201739 | | | | Y | | | | Y | | | | | | Y | | | | | Y | | | | | Y | | | | | Y | | | | | | Y | | | | | |
| Desalu 201356 | | | | Y | | | | Y | | | | | | Y | | | | | Y | | | | | U | | | | | Y | | | | | | Y | | | | | |
| **Critical appraisal indicators for cross sectional studies Q1-7**  Q1. Were the criteria for inclusion in the sample clearly defined? Q2. Were the study subjects and the setting described in detail? Q3. Was the exposure measured in a valid and reliable way? Q4. Were objective, standard criteria used for measurement of the condition?  Q5. Were confounding factors identified? Q6. Were strategies to deal with confounding factors stated? Q7. Were the outcomes measured in a valid and reliable way? Q8. Was appropriate statistical analysis used? | | | | | | | | | | | | | | | | | | | | | | | | | | | | | | | | | | | | | | | | |
| **Randomised controlled**  **Study** | | | **Q1** | | | **Q2** | | | **Q3** | | | **Q4** | | | **Q5** | | | **Q6** | | | | **Q7** | | | | **Q8** | | | | **Q9** | | | **Q10** | | | **Q11** | | | **Q12** | |
| Seys 201665 | | | Y | | | N | | | Y | | | Y | | | N | | | Y | | | | Y | | | | Y | | | | Y | | | Y | | | Y | | | Y | |
| Seys 201853 | | | Y | | | N | | | Y | | | Y | | | N | | | Y | | | | Y | | | | Y | | | | Y | | | Y | | | Y | | | Y | |
| Vanhect 201634 | | | Y | | | N | | | Y | | | Y | | | N | | | Y | | | | Y | | | | Y | | | | Y | | | Y | | | Y | | | Y | |
| **Critical appraisal indicators for randomised controlled study Q1-Q12**  Q1. Was true randomization used for assignment of participants to treatment groups? Q2. Was allocation to treatment groups concealed? Q3. Were treatment groups similar at the baseline?  Q4. Were participants blind to treatment assignment? Q5. Were those delivering treatment blind to treatment assignment? Q6. Were outcomes assessors blind to treatment assignment?  Q7. Were treatment groups treated identically other than the intervention of interest?  Q8. Was follow up complete and if not, were differences between groups in terms of their follow up adequately described and analyzed? Q9. Were participants analyzed in the groups to which they were randomized? Q10. Were outcomes measured in the same way for treatment groups? Q11. Were outcomes measured in a reliable way? Q12. Was appropriate statistical analysis used? | | | | | | | | | | | | | | | | | | | | | | | | | | | | | | | | | | | | | | | | |

| **Cohort**  **Studies** | **Q1** | **Q2** | **Q3** | **Q4** | **Q5** | **Q6** | **Q7** | **Q8** | **Q9** | **Q10** | **Q11** |
| --- | --- | --- | --- | --- | --- | --- | --- | --- | --- | --- | --- |
| Lipari 201818 | N/a | Y | Y | Y | U | N/a | Y | N/a | N/a | N/a | Y |
| Susanto 201532 | N/a | Y | Y | N | U | N/a | Y | N/a | N/a | N/a | Y |
| Wijayaratne 201336 | Y | Y | Y | Y | Y | Y | Y | Y | U | U | Y |
| Smallwood 201861 | Y | Y | Y | Y | Y | Y | Y | Y | Y | Y | Y |
| Marcos 201744 | Y | Y | Y | U | U | Y | Y | Y | Y | U | Y |
| Jouleh 201855 | Y | Y | Y | Y | Y | Y | Y | Y | Y | U | Y |
| Kelly 201911 | Y | Y | Y | Y | U | Y | Y | Y | U | Y | Y |
| Kim 201930 | Y | Y | Y | Y | N | Y | Y | Y | Y | U | Y |
| Meng-jer 201842 | Y | Y | Y | Y | Y | Y | Y | Y | U | U | Y |
| **Critical appraisal indicators Cohort study Q1-Q11**  Q1. Were the two groups similar and recruited from the same population? Q2. Were the exposures measured similarly to assign people to both exposed and unexposed groups? Q3. Was the exposure measured in a valid and reliable way? Q4 Were confounding factors identified? Q5. Were strategies to deal with confounding factors stated? Q6. Were the groups/participants free of the outcome at the start of the study (or at the moment of exposure)? Q7. Were the outcomes measured in a valid and reliable way Q8. Was the follow up time reported and sufficient to be long enough for outcomes to occur? Q9. Was follow up complete, and if not, were the reasons to loss to follow up described and explored? Q10. Were strategies to address incomplete follow up Q11. Was appropriate statistical analysis used? | | | | | | | | | | | |
